# Supplementary material
Source: MDPI journal article supplement (https://www.mdpi.com/2073-4395/13/1/11)
Supplement: s1 [file s1 › agronomy-2031536-supplementary.pdf]

|          |          |          |          |          |          |          |          |          |          |          |          |          |          |          |          |          |          |          |          |          |
|----------|----------|----------|----------|----------|----------|----------|----------|----------|----------|----------|----------|----------|----------|----------|----------|----------|----------|----------|----------|----------|
| N2I<br>3 | N2I<br>4 | N2I<br>5 | N2I<br>2 | N2I<br>1 | N2I<br>7 | N2I<br>6 | N3I<br>1 | N3I<br>2 | N3I<br>3 | N3I<br>4 | N3I<br>5 | N3I<br>6 | N3I<br>7 | N1I<br>4 | N1I<br>2 | N1I<br>5 | N1I<br>6 | N1I<br>1 | N1I<br>3 | N1I<br>7 |
| Path     |          |          |          |          |          |          |          |          |          |          |          |          |          |          |          |          |          |          |          |          |
| N3I<br>4 | N3I<br>6 | N3I<br>5 | N3I<br>3 | N3I<br>7 | N3I<br>2 | N3I<br>1 | N1I<br>3 | N1I<br>5 | N1I<br>6 | N1I<br>1 | N1I<br>7 | N1I<br>4 | N1I<br>2 | N2I<br>5 | N2I<br>4 | N2I<br>3 | N2I<br>1 | N2I<br>2 | N2I<br>7 | N2I<br>6 |
| Path     |          |          |          |          |          |          |          |          |          |          |          |          |          |          |          |          |          |          |          |          |
| N1I<br>1 | N1I<br>2 | N1I<br>3 | N1I<br>4 | N1I<br>5 | N1I<br>6 | N1I<br>7 | N2I<br>2 | N2I<br>3 | N2I<br>1 | N2I<br>5 | N2I<br>6 | N2I<br>7 | N2I<br>4 | N3I<br>7 | N3I<br>5 | N3I<br>6 | N3I<br>3 | N3I<br>1 | N3I<br>4 | N3I<br>2 |
| Path     |          |          |          |          |          |          |          |          |          |          |          |          |          |          |          |          |          |          |          |          |

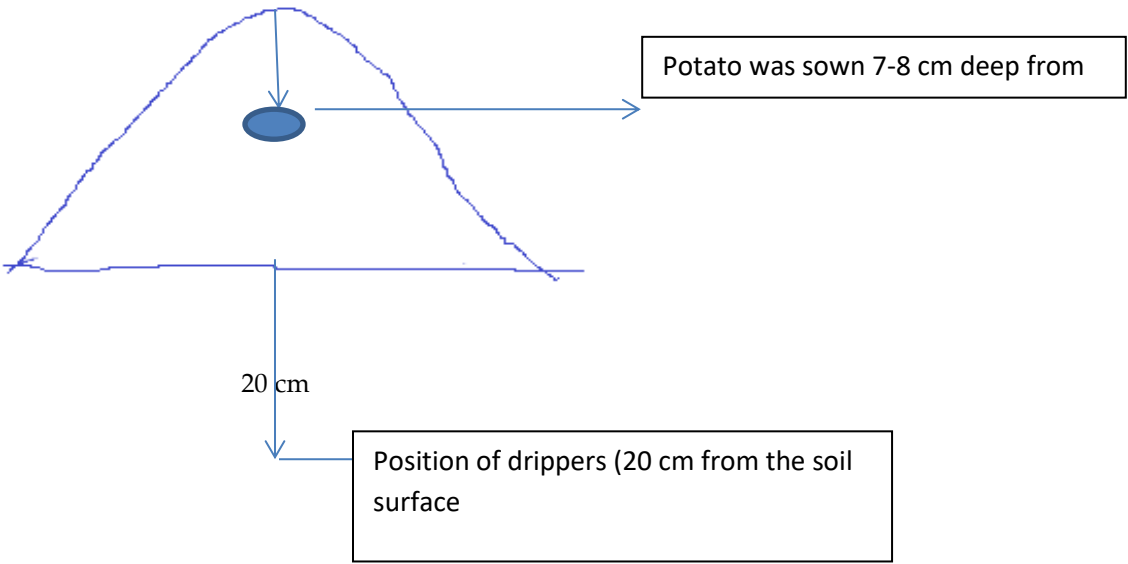

Figure S1. Layout of the field experiment.
